# Supplementary material for: Tri-state logic computation by activating DNA origami chains
Source: Royal Society of Chemistry journal article supplement (doi:10.1039/d3nr06010a), 2024-01-01
Supplement: d3nr06010a1.pdf [file d3nr06010a1.pdf]

# Supplementary Information

## Tri-State Logic Computation by Activating DNA Origami Chain

Kun Wang<sup>1#\*</sup>, Qiuyan Huang<sup>2#</sup>, Mohammed Ragab Elshaer<sup>3</sup>, Brian Knorr<sup>3</sup>, Paul Chaikin<sup>1\*</sup> & Guolong Zhu<sup>1,2,3\*</sup>

<sup>1</sup>*Department of Physics, New York University, New York, NY 10003, USA*

<sup>2</sup>*Department of Chemistry, New York University, New York, NY 10003, USA*

<sup>3</sup>*Department of Chemistry, Biochemistry, and Physics, Fairleigh Dickinson University, Madison, NJ 07940, USA*

#These authors contributed equally to this work.

\*Corresponding Email: [kunwangneu@gmail.com](mailto:kunwangneu@gmail.com), [Chaikin@nyu.edu](mailto:Chaikin@nyu.edu), [g.zhu@fdu.edu](mailto:g.zhu@fdu.edu)

## 1. Additional AFM images of logic gate “AND”

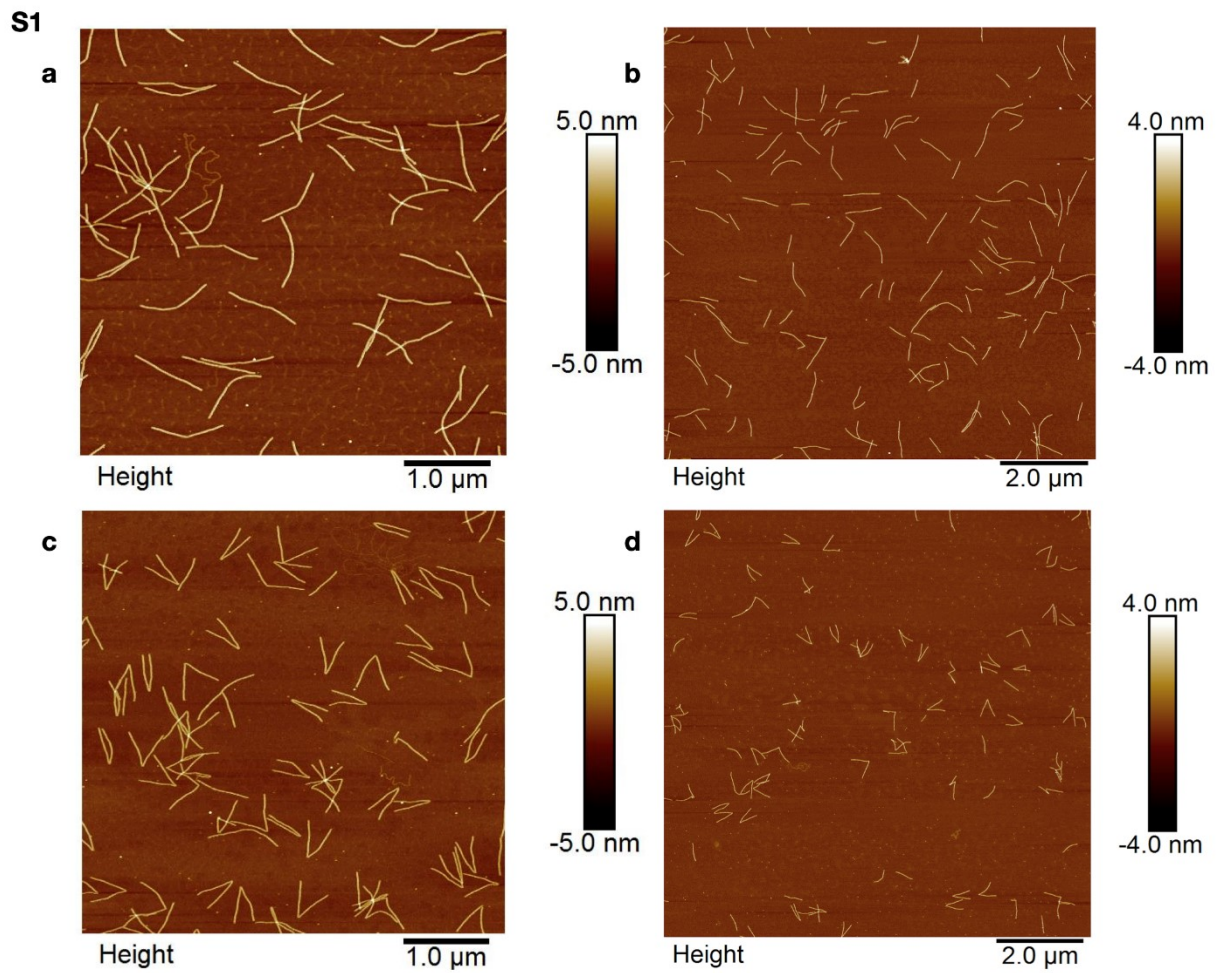

**Figure S1. AFM images of logic gate “AND”.** (a) and (b) are open geometry with output “0”. (c) and (d) are folded geometry with output “1”.

## 2. Additional AFM images of one-folding geometry in tri-state buffer logic gate

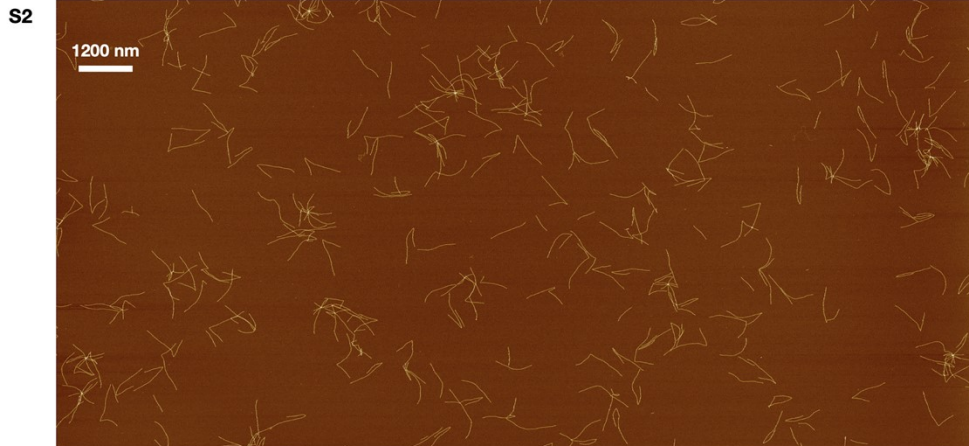

**Figure S2. AFM images of one-folding geometry.** Excluding non-desired monomer, dimer and non-specific aggregations, the percentage of trimer with one-folding geometry is at least 70% (Statistics was obtained from over 500 DNA origami, the AFM image in the figure is only a representative one). It is safe to set the threshold to be 50% to read the output to be “0”.

### 3. Additional AFM images of two-folding geometry in tri-state buffer logic gate

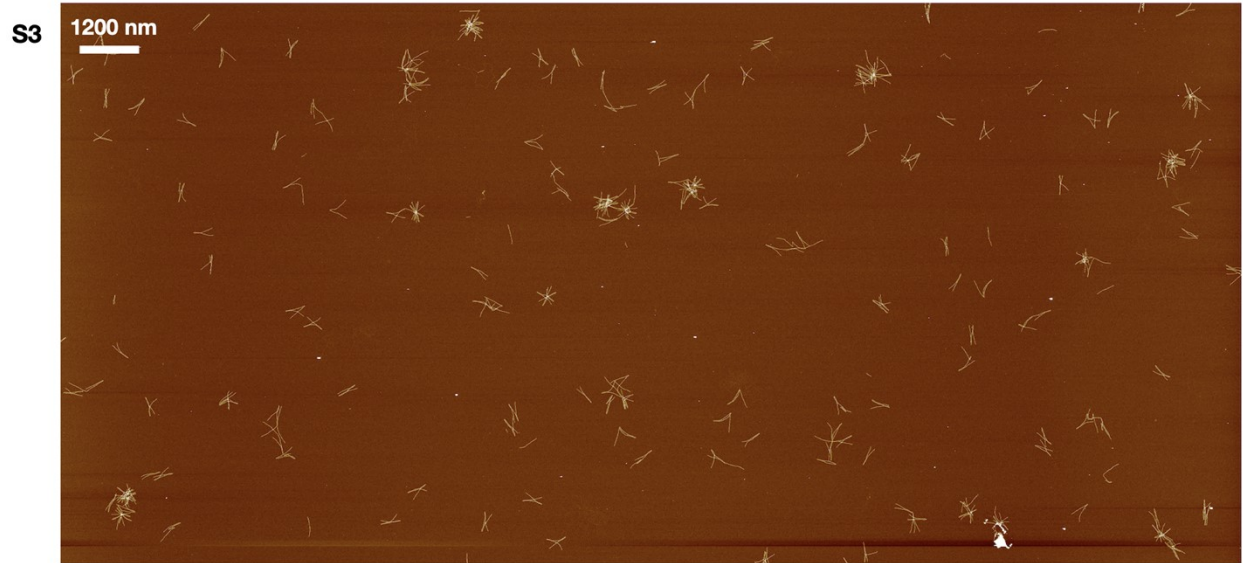

**Figure S3. AFM images of two-folding geometry.** Excluding non-desired monomer, dimer, and non-specific aggregations, the percentage of trimer with two-folding geometry is at least 70% (Statistics was obtained from over 500 DNA origami, the AFM image in the figure is only a representative one). It is safe to set the threshold to be 50% to read the output to be “1”. The entangled origami is ignored in statistics because it does not provide any clear view on individual’s geometry.

#### 4. Additional AFM images of one-folding geometry in tri-state inverter logic gate

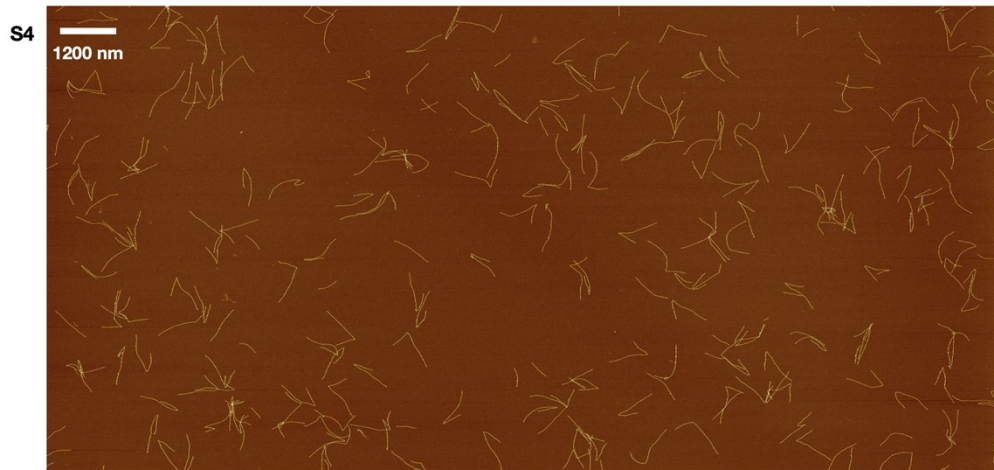

**Figure S4. AFM images of one-folding geometry.** Excluding non-desired monomer, dimer, and non-specific aggregations, the percentage of trimer with one-folding geometry is at least 70% (Statistics was obtained from over 500 DNA origami, the AFM image in the figure is only a representative one). It is safe to set the threshold to be 50% to read the output to be “0”.

## 5. Additional AFM images of two-folding geometry in tri-state inverter logic gate

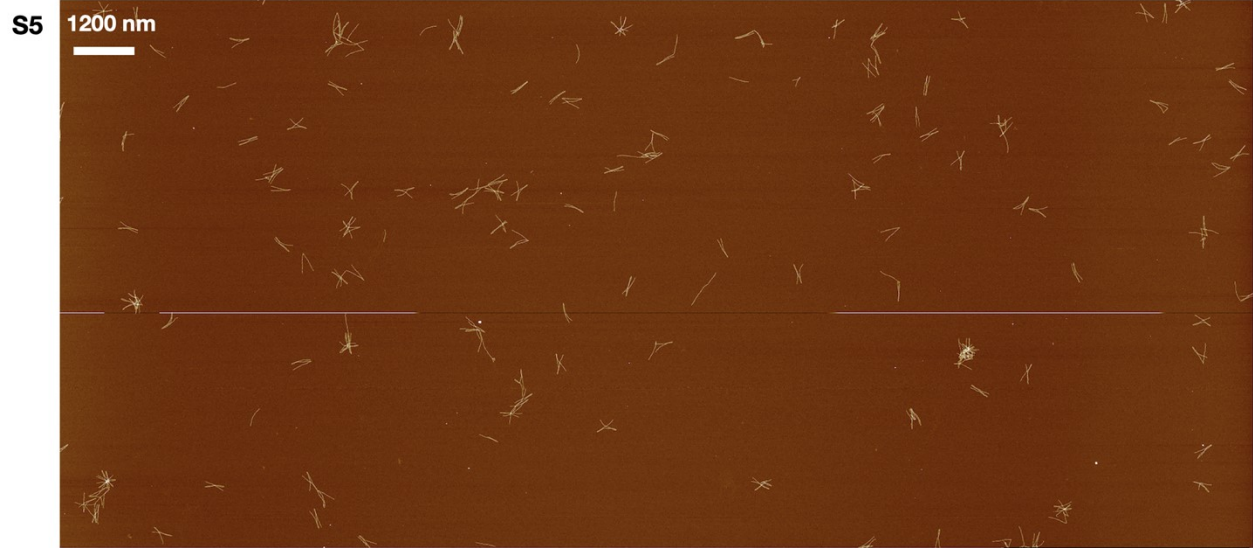

**Figure S5. AFM images of two-folding geometry.** Excluding non-desired monomer, dimer, and non-specific aggregations, the percentage of trimer with two-folding geometry is at least 70% (Statistics was obtained from over 500 DNA origami, the AFM image in the figure is only a representative one). It is safe to set the threshold to be 50% to read the output to be “1”.

## 6. Entropy Gain in Folding Left Hinge in Tri-state Buffer Design

In the presence of both enable and input strands in the free solutions, a partial duplex stem with green-green\* would form, as the concentration of enable/input (50 nM) is 100 times more than that of the sticky ends on origami hinge (0.5 nM). Then the red\* on this partial duplex stem may hybridize with the red on the left hinge, seemingly impeding the folding of left hinge. Let's call this is scenario 1 (Fig. S6). However, the folding on the left hinge still forms because of lower Gibbs Free Energy in the folded state due to significantly higher local concentration of the hinge-sticky ends.

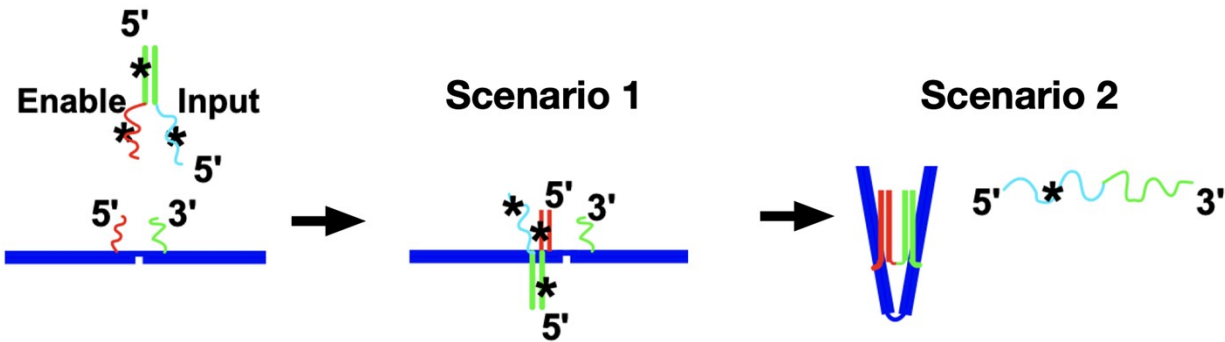

Fig. S6 Schematics of folding process by Enable/Input duplex.

In scenario 2 the folded state, a free enable strand hybridizes with the red and green sticky ends on the left hinge (Fig. S6). It was true that from the enthalpy-hybridization energy point of view, there was no reason for scenario 2 to displace scenario 1, if scenario 1 had taken place first. However, the local concentration of sticky ends on the hinge is many orders of magnitude higher than that of the input/enable in free solutions, resulting in a great entropy gain to fold the hinge. The concentration of input strand is  $\sim 50$  nM. Notably, one sticky end on the hinge is locally confined within  $\sim 5$  nm<sup>3</sup> after folded, giving a local concentration of  $\sim 0.01$  M. Hence, the concentration ratio of the local sticky ends to free input in solution is  $\sim 5 \cdot 10^5$ . The entropy linearly depends on the natural logarithm of relative concentrations. In our case, entropy change for transition from scenario 1 to scenario 2 is  $\Delta S_{12} = k_B \ln(5 \cdot 10^5) = 13 k_B$ . Then  $\Delta G_{12} = \Delta H - T\Delta S = -13 k_B T$ .

With Boltzmann distribution, Probability  $\sim e^{-energy/kT}$ ,  $13 k_B T$  lower in free energy give a factor of  $5 \cdot 10^5$  higher in probability for it to be in scenario 2 rather than in scenario 1.

The same reasoning also applies to the inverter logic gate in Figure 4 when both enable and input strands are present.





## 7. Factors Affecting Folding Angles

The folding angles in the two folding mechanisms(Fig.1c, d) by design might be a bit different, because the location of the sticky ends connected with the staple strands are different. It was also different that the left hinge was folded by one input strand, while the right hinge was folded by two input/enable strands. For 2-folding state, the angle of right hinge might tend to be more compact than the left hinge. There were many factors to vary the angles we've explored, such as changing the location design of the sticky ends on the hinge (longer or shorter distance away from the hinges vertex), different  $Mg^{2+}$  concentrations, the length of sticky ends, the concentration ratios of enable/input to origami, etc. The folding angles indeed seemed to be relevant to all these controlled factors. However, there were also some other not so easy to control factors involving in deposition of origami on the mica surfaces that as well slightly varied the folding angles more randomly, such as mica surface difference in different area, humidity or air flow speed when drying mica, AFM tips properties, etc. While these would be interesting, we have decided not to include the study of angles in this article. Because our major aim is to demonstrate the idea of tri-state logic using DNA origami. As long as the clear difference between folding and not-folding can be clearly told apart, the output signal is unambiguously generated.

## 8. Control Experiment for Folding Mechanisms

We designed control experiments with poly-T non-specific strands to substitute enable and input strands in the two folding mechanisms. When the substitute enable and input strands were added in the DNA origami dimer, no statistically meaningful number of hinges was found to be folded revealed by AFM imaging.

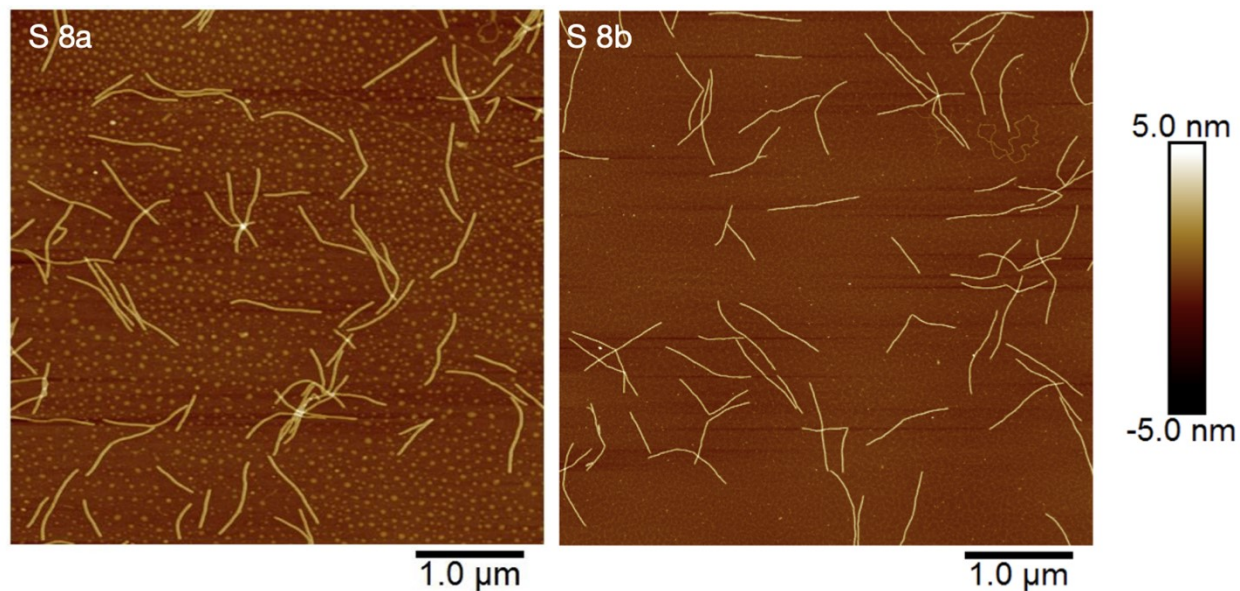

**Figure S7. AFM images of control experiments.** **a)** DNA origami dimer platform of folding mechanism 1 (as shown in Fig. 1c) was added with non-specific Poly-T strands as control to substitute the input to find no folding at the hinge. **b)** DNA origami dimer platform of folding mechanism 21 (as shown in Fig. 1d) was added with non-specific Poly-T strands as control to substitute the input to find no folding at the hinge.

## 9. DNA Sequences of 6HB DNA Origami and sticky ends

6HB DNA Origami uses scaffold DNA M13.

### Staple strands:

6HBM13-

001 TTATCCGCTCACAATTCCACACAACA

6HBM13-

002 TACGAGCCGGAAGCTCGAATTCGTAA

6HBM13-

003 CGGGTACCGAGCATAAAGTGTAAGCCTGG

6HBM13-

004 GGTGCCTAATGAGTGCCAAGCTTGCATGCC

6HBM13-

005 TAAAACGACGGCCAGTGAGCTAA

6HBM13-

006 CTCACATTAATTGCGTTGCGCTC

6HBM13-

007 CCTGTGTGCTTTCCCAGTCACGACGTTGTGCAGGTCGACTTA

6HBM13-

008 ACTGCCCCGAAATTGTCATGGTCATAGCTATCTAGAGGATCCC

6HBM13-

009 AGTTGGGTAACGCATGTGCTGCAAGGCGGTGCTGGCGAAAGG

6HBM13- CGCCAGGGTTTTCCAGTCGGGAAACCTGGCTATTACGCCATT

010

6HBM13-

011 GGGCCATTCGCCATGTGCGGGCCTCTTCTCGTGCCGGAAGAT

6HBM13-

012 ACCAGGCAAAGCGACTCCAGCCAGCTTTGGCCTCAAGCTGCA

6HBM13-

013 GGGAAAGGATCGGCCACGACGACAGTATCCCGGCACCGCTTAA

6HBM13-

014 TTAATGAGCGATCGTCAGGCTGCGCAACGTCTGGTGCCGGAA

6HBM13-

015 CCGTGCATCTGCACTAGATGGGCGCATCTGATAGGTCACGTT

6HBM13-

016 GACAGTTTGAGGGGAACGCGCGGGGAGAGACCGTAATGGGTT

6HBM13-

017 GGCATTAAATGTGAACAAACGGCGGATTGGCGGTTCCAATAG

6HBM13-

018 AGCTTTCATCAATGGCCATCAAAAATAATTTTTAATGCGTAT

6HBM13-

019 GATTCTCCAGGGTGTTAAATCAGCTCATTTCGCGTCTGGCTT

6HBM13-

020 TGGGCGCCGTGGGAGCGAGTAACAACCCTTCTTCCTGTAGCC

6HBM13-

021 GTTAAAATTCGCGTTGTAAACGTTAATAGTAAGCAAATATTT

6HBM13-

022 AGATTAAATTTTTGGTTTTTCTTTTCACGGAAGATTGTATCG

6HBM13-

023 AAAAACTAGCATGAAGCCCCAAAAACACAGTGAGGGCTATC

6HBM13-

024 AACGGTAATCGTATCATTGCCTGAGAGTCTACAAAACGGGCA

6HBM13-

025 GTTGATAATTGCCCTATTTTTGAGAGATCTGGAGCAAACAGA

6HBM13-

026 ACAGCTGATCAGAATCAATCATATGTACCTAGAGAATCGATG

6HBM13-

027 TAAATTAATGCCAGTTCAACCGTTCTAGCCCACCATCAATAT

6HBM13-

028 GGGGAGAGGGTAGCTTCACCGCCTGGCCAGACAGTCAAATCG

6HBM13-

029 GATTAAATGCAATGGTGAGAAAGGCCGGCTGAGAGTTTTGCG

6HBM13-

030 CCCTCATATATTTAAAGCCTTTATTTTCAGTAATACAGTTGCA

6HBM13-

031 AAAGATTGTCCACGAACATTATGACCCTACGCAAGGATAACA

6HBM13-

032 GCAAGCGCAAAGGCCTGAGTAATGTGTAGAAATTTTTAGAA

6HBM13-

TAAAGCTAAATCTCCAATAAAGCCTCAGAGAATTAGCAAAT

033

6HBM13-

034 TTGGTTGTACCAAACCTGGTTTGCCCCAGGGCAAGGCAAAGGT

6HBM13-

035 TAGAAAAGGTGGCACAATAAATCATACACAGGCGAAGATACA

6HBM13-

036 GGGGCGCGAGCTAGGCAAATGGTCAATAGACCATTAAATCCT

6HBM13-

037 GTAGCATGGTGGTTAGTAGATTTAGTTTACCTGTTTAGCTAC

6HBM13-

038 GTTTGATTAACATCTCAATTCTACTAATTAATATTTTCATTT

6HBM13-

039 AGTTGATTCCCACAAGTTTCATTCCATAAGAAGTACGGTGTC

6HBM13-

040 AAATTCTGCGAACGCCGAAATCGGCAAAAATATGCAACTATA

6HBM13-

041 TGTTTGCGGATGGCCTCAACATGTTTTAATCCCTTAAACTCC

6HBM13-

042 TAAGAGGTCATTGAGGTCAGGATTAGAGCGGAAGCATAAATC

6HBM13-

043 ATATAATTAGCCCGAAAGCGAACCAGACAGTACCTTTAATAA

6HBM13-

044 AAAAGAAGCTGTAGTTAGAGCTTAATTGTCTGCTCCTTTTGA

6HBM13-

045 ATATCGCGTTTTGTAAGCCCGAAAGACTCTCAAAAAGATTAA

6HBM13-

046 TCAATTCGAGCTTCAGATAGGGTTGAGTAGCGGATTGCATGA

6HBM13-

047 GAGAGAATGACCATATAGTCAGAAGCAAGTTGTTCTGCGGAA

6HBM13-

048 AGTTCAGAAAACGGCATAAATATTCATTCCAATACCAGTTTG

6HBM13-

049 TTACCCTAGTCCACAGACTGGATAGCGTGAATCCCCCTCACC

6HBM13-

050 GAACAAGGACTATTAAATCAAAAATCAGTGAATGCTTTAAAC

6HBM13-

051 AGAGGGGGTAATCATGCAAAAAGAAGTTTGTAATAGCGAGAGG

6HBM13-

052 ATAGTAAAATGTTTTATTAAAGAACGTGGATAAAAACCAACT

6HBM13-

053 CTAAGGAATTACGAGTTTACCAGACGACGACTCCAAAGATTC

6HBM13-

054 ACATAACGCCAATTGTTGAGATTTAGGAAGGTAGAACGTCAA

6HBM13-

055 CTATCATAAAACCGAACAACATTATTACATACCACATTCATC

6HBM13- AGGGCGAAACCCTCGGCATAGTAAGAGCAAACCTAATGCAGAT

056

6HBM13-

057 TACGTTAATAAACAACGTTGGGAAGAAAAACATTATACCAGT

6HBM13-

058 CTACGAACTAACGGTCTATCACTAAATCTAAGAACTGGCTCA

6HBM13-

059 CATTGGGCTTGAGAACCTTATGCGATTTGGAACCCAAAGCTG

6HBM13-

060 ACGAGTAGTAAAGGTTTCAGTGAATAAGGACGTAACCTAAAGGG

6HBM13-

061 AATCATTGATTTAGCATTACCCAAATCACTTGCCCTGACGAG

6HBM13-

062 AGCCCCCGTGAATTTGGTTTAATTTCAAAGAGAAACACCAGA

6HBM13-

063 TAATCTTGACAAATGCTGACCTTCATCACTCCAGGCGCATAG

6HBM13-

064 TGGAACCGGATATTAGCTTGACGGGGAAACGGTGTACAGATT

6HBM13-

065 GCGCGCAGACGGTCAAGAGGACAGATGAAGCCGGCCATCGCC

6HBM13-

066 AGCCGGAACGAGTGAAATTGTGTCGAAATTTGTATGAACGTG

6HBM13-

067 CTGACCAAGGAAGGAAGTACAACGGAGATCCGCGACCTGCC



6HBM13-

068 GCGAGAAACTTTGAAATCATAAGGGAACCCTCCATGTTACTT

6HBM13-

069 AGCGATTATACCACCACTCATCTTTGACCGAAAGAATACT

6HBM13-

070 GAAAGCGCGAAACAGAAGAAAGCGAAAGACGAAAGAGGCAAA

6HBM13-

071 AAGGAAGTTTCCATGGCACCAACCTAAAGAGCGGGAGCATCG

6HBM13-

072 ACTTTTTCATGAAAGAGGGTAGCAACGGGAAAGACCGCTAGG

6HBM13-

073 AATGCCACAAGTGTTCCACCTCAGCAGCCTACAGAGGCTTAG

6HBM13-

074 GCGCTGGCTACGAATAAACGGGTAAAATGGTGAGGACTAAAG

6HBM13-

075 TTAAAGGCCGCTAAGCTGAGGCTTGCAGACACCGATATATTC

6HBM13-

076 AATTTGCGGGATCGAGCGGTCACGCTGCCGCCACGCATAGT

6HBM13-

077 GGAGGTGAATTTCTATGACAACAACCATGCGTAACTCTCCAA

6HBM13-

078 AGCTTGCTTTCGTCAAGGCTCCAAAAGGTTGAAAACACCACA

6HBM13- TAGTTGCCGCTTAAATAATTTTTTTCACGAGCCTTTAATTGAG

079

6HBM13-

080 CCGCCGGCCGACATAAACAGCTTGATAAATATCGGTTTATC

6HBM13-

081 GAACAATAAAGTACGGAGTGAGAATAGCCCTTTCAACAGTT

6HBM13-

082 AGGAATTGCGAATATGCGCCGCTACAGGTTTGCTAAACAAGA

6HBM13-

083 TCACGATCTAAAGTTTTCTGTATGGGATGCGCGTACGTCACC

6HBM13-

084 ATAGTTAGCGTAAGCAAACACTACAACGCCTGAGTTTCTATGGT

6HBM13-

085 GTTAGTAACGAGCAATGTACCGTAACACTGTAGCATTCCAAG

6HBM13-

086 TGCTTTGAATGAATTTTGTCGTCTTTCCTCCAGACAGCCCTC

6HBM13-

087 GGATAGCAAGCCTTCACCACCCTCATTTAGCCGCCACCCTCA

6HBM13-

088 GTCAATAGGAACCCCGTATAACGTGCTTCCACCCTCAGAAAC

6HBM13-

089 GAGCCCGGAATAGGCACCCTCAGAACCGTCCTCGTTAGCGGG

6HBM13-

090 GATATAAGTATAGCTGCTCAGTACCAGGTTAGGATTAGAATC

6HBM13-

091 AGGTTTAGAGCTAACCTCAAGAGAAGGACGGATAAGTGCCCA

6HBM13-

092 AGAGCGGGTACCGCTGTATCACCGTACTAAGTCGAGAGGGTT

6HBM13-

093 TGAAAGTATTAACCTATTATTCTGACACCCTGCCTATTT

6HBM13-

094 GTGAGGCTGAGACTACAGGAGGCCGATTACAGTTAATGCCGG

6HBM13-

095 CGAGTGTACTGGTACAGTGCCCGTATAAAAAGGGAAAGCGCA

6HBM13-

096 TGATGATACAGGGACTGAATTTACCGTTGAATGGATTTTAGA

6HBM13-

097 AGTGCCTGGTACGCCCTCATTAAGCCACCAGTAAGCGTCGC

6HBM13-

098 CAGGAACTGAGTAAATAAGTTTTAACGGTGATACATGGCTTT

6HBM13-

099 CTTGATATTCACCAGCAGGTCAGACGATGGTTGACAGGAGGT

6HBM13-

100 ATAAACAAATAAATCAGAATCCTGAGAACCGCCGCCAGCATC

6HBM13-

101 TGAGAACCGCCACCAACCACCAGAGGTGTTTTAATCAAA

6HBM13-

GCCGCCACCCTCAGCCGGAACCAGAGCCTTTTCATTATAATC

102

6HBM13-

103 AGAGCCGCCACCGATAGCGTTTGCCATCACCACCGGAACCGG

6HBM13-

104 AGTGAGGCCACCAGCTCAGAGCCACCACTCGCCTCCCTCAGA

6HBM13-

105 CATTTTCGGTCACCGTAGCGCGTTTTACCCCTTTAGCGTCA

6HBM13-

106 AGTAGCCCCCTTATGTAAAAGAGTCTGTGAATCAAGTTTGTC

6HBM13-

107 GAAAGGCCGGAAACAATCAGTAGCGACACCATCACCGACTTG

6HBM13-

108 ATTACCATTAGCCTATTTGGGAATTAGACCGTCACGCAAATT

6HBM13-

109 GATAGCAGTAGCAAAAGGTGAATTATCAGCCAGCAAAATCTA

6HBM13-

110 AACCGTTGCACCGTGTCACCAATGAAACGGACCAGTAGCACC

6HBM13-

111 AATATTGACGGAACATTGAGGGAGGGAACAGGGCGACATTCA

6HBM13-

112 AAAATTATTCATTATACTTCTTTGATTACCAAAGACAAAATC

6HBM13-

113 ACACCACGGAATAAATGGTTTACCAGCGGTAATAATGTTAGC

6HBM13-

114 AAACGCAAAGACCGGTAGAAAATACATACGCAGTACATCACT

6HBM13-

115 AATAGAAGTAGAAGAAGACTCCTTATTACATAAAGGTGGCGA

6HBM13-

116 TGCCTGAAATTCATGTTTATTTTGTCCACCGAACATATAAAAAG

6HBM13-

117 ATACCCAAAAGAGAAAACGCAATAATAAAACAGAAGGAAACC

6HBM13-

118 CAACTGGCATGATTAACTCAAACCTATCGGAACAAAGTTACTC

6HBM13-

119 GAATGAAATAGCAAGTAAGCAGATAGCCGCCTTGCCTAATAT

6HBM13-

120 GAGCAAGAAACAGGGAGATAACCCACAATTGAGCGTGGTAAT

6HBM13-

121 CCTTTTTACAATATAAGTCAGAGGGTAAGAATTGAGTTAAGG

6HBM13-

122 ATCCAGAAAGAAAATAGCTATCTTACCGCGGCCCAATAATAA

6HBM13-

123 AGAATTAAGTGAAGCGGGAAGCGCATTAGAAAAATAACATAAAA

6HBM13-

124 GAACACCCTGAACATACCGCCAGCCATTCTTTACAGAGAGGC

6HBM13-

ACTATCCCAATCCAATGAAAATAGCAGCGCAACAGCGCTAAC

125

6HBM13-

126 AGCCATATTATTAGGTCTTTCCAGAGCCTTACCAAGAAAAAC

6HBM13-

127 GTTTAACGAAATACTTTTATCCTGAATCTAATTTGCCAGTAG

6HBM13-

128 GCTCATGGTCAAAAAATAAGAAACGATTTTTACAAAATAAAC

6HBM13-

129 TTGCTATTTTGCCAGCCTTAAATCAAGATTTGCGGGAGGTTT

6HBM13-

130 AAACCCAGCTACAACACTACATTTTGACGCAACCTCCCGACTTT

6HBM13-

131 TGAAGCAAATCAGAGAGGCGTTTTAGCGTCAATCGCATCGAG

6HBM13-

132 GCGCCAATAGCAAAGCAAGCCGTTTTTCCGCACTTCTGAAA

6HBM13-

133 TATTCTATTTACATTATTAACCAAGTAATTTTCATCGTATC

6HBM13-

134 TGGATTAAGAACGCTATAGAAGGCTTATTGGGAATCATTACC

6HBM13-

135 TTTCCCTTATCATAAAAATCAATAATCGGCCCCCGAGCATGTAGA

6HBM13-

136 AATCCAAGAACGGGTGGCAGATTCACCACATCCTAATTTAGG

6HBM13-  
137 AATGCAGAACGCGCGAAAAATAATATCCGTCACACTACCGAC

6HBM13-  
138 ATG TTCAGCTAACCGGTAAAGTAATTCTTATAAAGGACCAGT

6HBM13-  
139 TAAGTCCGGGACATCAGTAATAAGAGAAGTCCAGACGACGTA

6HBM13-  
140 AATAAAATGAACAAC TGT TATCAACAATGACAATAAACAAC

6HBM13-  
141 ATTTAGGCAGAGAATAACAACGCCAACATATGAGAATCGCCA

6HBM13-  
142 TAGCATTTTCGAGCTCTGGCCAACAGAGGTAGGGCTTAATGA

6HBM13-  
143 TACTGTTTAGTATCGCCAACGCTCAACAATAGAACCGTGTGA

6HBM13-  
144 ACTAGAAAAAGCTTTAAGGCGTTAAATATACCGACCCTTCTG

6HBM13-  
145 CTTACCAAGCGTAATTAATGGTTTGAAAAGAATAAACACCAG

6HBM13-  
146 ACCTGAAGTATAAAATATGCGTTATACATTGGAATCATAATT

6HBM13-  
147 TTAATTTTCATCTGATTTTCAAATATATTAAGAACGCGAGAA

6HBM13-  
CTTCTGACCTAAATGAATACGTGGCACAATCGCAAGACAATT

148

6HBM13-

149 AATTTAACCTCCGGCTGATGCAAATCCAGACAATATAAGACG

6HBM13-

150 AGAGACTACCTTCTGAAGAGTCAATAGTCTTAGATTTTTTTGA

6HBM13-

151 ACTATATTTAGTCTAAACATAGCGATAGGAATTTATCAAAAA

6HBM13-

152 ATGGCTAGTAAATGCTTAGGTTGGGTTATTATCATAGGTCTG

6HBM13-

153 TTAATTTTCCCTAAGTAAATCGTCGCTATAGAATAACCTTGC

6HBM13-

154 TCTAGAATCCTTGATTAATGCGCGAACTATATATGTGAGTTA

6HBM13-

155 TTATTACATTTAACCAGTACATAAATCAGATAGCCATTCATT

6HBM13-

156 AAAACAAAATTACTTTACCTGAGCAAAAGCGAATTCTAAAAC

6HBM13-

157 TTTTTTATTAAAAAAAATCGCGCAGAGGAAGATGATGAACC

6HBM13-

158 ATCGCCAATGGAAAAATTTCAATTTGAATCGACAAACATCAAG

6HBM13-

159 TGATTGCTTTGAATAACAATAACGGATTTACTTTTACATCGG



6HBM13-

160 TTATACCAAGTTACTACCGAACGAACCACAGTAACAGTACCC

6HBM13-

161 GACGTAAAACAGAAGTCAGATGAATATACCAGCAGGTTTGGGA

6HBM13-

162 AAATTATTTGCAGAACTTCTGAATAATGCCTGATTAAGATAA

6HBM13-

163 TTTTCAGGTGAGGCTTCATCAATATAATGAAGGGTTAGAATA

6HBM13-

164 AACAGAGGTTTAACATAAAGAAATTGCGCACCTACCATATCA

6HBM13-

165 TTCCTGATTATCTAAGCGGAATTATCATTAAAGAAACCACCAG

6HBM13-

166 GAAGATGATGGCAAGGTCAGTATTAACATTTGCGGAACAAGA

6HBM13-

167 AACGTATTAATCCAGTAACATTATCATCCGCCTGGTCAATA

6HBM13- AATTCGACAACCTGGATACATTTGAGGATTAGAGCCCAACAGTGCCACG

168 CAAGTTTG

6HBM13- CAATCAATATCTGGTCAGTTGTAATTTAATGAGAGCAACAATA

169 GAT

6HBM13-

170 TTTGCCCGAACGTTATGCAAATCAACAGTTAAACCCT

6HBM13- ATCGAAAGGAATTGAGGAAGGGACTTTACAAAC

171

6HBM13-

172 TTAGAAGTATTATTATCTAAAATATCCTCAAAT

6HBM13- TCACCTTGCTGAACTTTAGGAGCACTCAGCAGCAAATGAAAAATCTAA

173 AGCA

**Sequences Design of Sticky Ends, input and enable strands:**

6H-D3-169-4T

TTTT CAATCAATATCTGGTCAGTTGTAATTTTAAAAGTTTG

6H-D3-168

AATTCGACAACTGGATACATTTGAGGAT

Ci-CN0-168+

CTCGTCCTATGTCCAGATTAA T

TAGATTAGAGCCCAACAGTGCCACGCTGAGAGCAACAATAA

6H-CN0-3T-173

GGTAAGGTGGTCGATACTCCTC TTT TCACCTTGCTGAACTTTAGGAGCACT

6H-CN0-3T-174

CAGCAGCAAATGAAAAATCTAAAGCA TTT GGTATTGTTCCAGACGGT

6H-CN1-002

GAGGAGTATCGACCACCTTACC TACGAGCCGGAAGCTCGAATTCGTAA

6H-CN1-003

CATAAAGTGTAAGCCTGG ACCGTCTGGAACAATACC

Ci-CN2-008 (also CN1)

ACTGCCCGAAATTGTCATGGTCATAGCTATCTAGAGGATCCC CGGGTACCGAG T  
GAGCTGGAGAGTCTAATCTAA

Cir-Enable (strand 2\*1\*)

TTAGATTAGACTCTCCAGCTC TT TTAATCTGGACATAGGACGAG

6H-CN1-3T-173

TGCTGCTCCTAAATTCTCGTAT TTT TCACCTTGCTGAACTTTAGGAGCACT

6H-CN1-3T-174

CAGCAGCAAATGAAAAATCTAAAGCA TTT AATTAAGCAATTTGGTAT

6H-CN2-002

ATACGAGAATTTAGGAGCAGCA TACGAGCCGGAAGCTCGAATTCGTAA

6H-CN2-003

CATAAAGTGTAAGCCTGG ATACCAAATTGCTTAATT

Buf-CN2-008 (strand 3)

ACTGCCCGAAATTGTCATGGTCATAGCTATCTAGAGGATCCC CGGGTACCGAG T  
GAGCTAAAGTCGTGTGTTAAG

Cir-inp-Buf (strand 3\*2)

CTTAACACACGACTTTAGCTC TT GAGCTGGAGAGTCTAATCTAA

Inv-CN1-168+ (strand 41)

CCTAACTATCTTTAGCCAATG CTCGTCCTATGTCCAGATTAA T  
TAGATTAGAGCCCAACAGTGCCACGCTGAGAGCAACAATAA

Ci-*inp*-Inv (strand 1\*4\*)

TTAATCTGGACATAGGACGAG AA CATTGGCTAAAGATAGTTAGG

Cir-*inp*-Inv (strand 1\*4\*)

TTAATCTGGACATAGGACGAG CATTGGCTAAAGATAGTTAGG
